# Supplementary material for: NLRP3 activation induces ASC-dependent programmed necrotic cell death, which leads to neutrophilic inflammation
Source: PubMed Central journal article supplement (PMC3674376; doi:10.1038/cddis.2013.169), 2013-05-23

Supplementary Figure S4

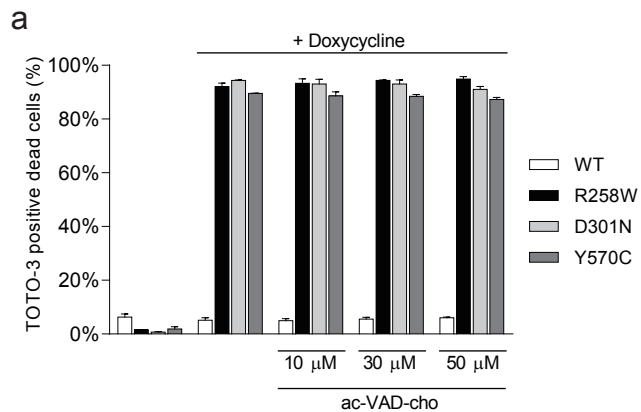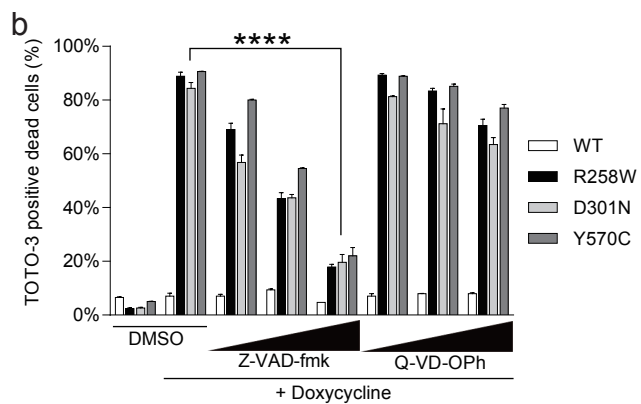

**C**

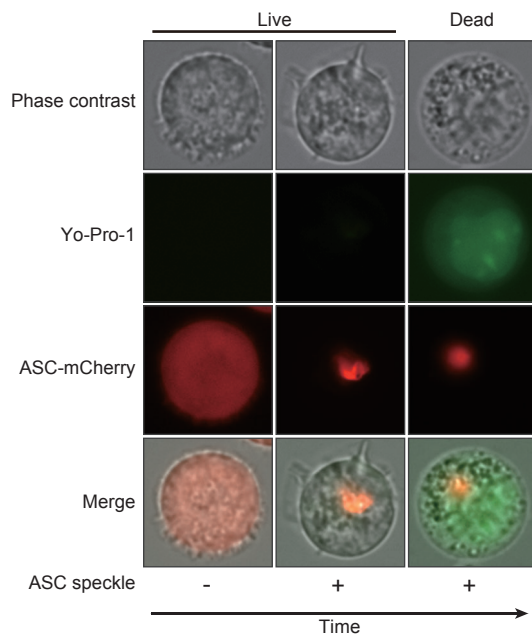

Supplement: cddis2013169x4.pdf [file cddis2013169x4.pdf]
